# Supplementary material for: Towards Real-Time Industry-Proof Pork Breed and Boar Taint Classification using Rapid Evaporative Ionisation Mass Spectrometry (REIMS)
Source: Research Square preprint supplement (doi:10.21203/rs.3.rs-7537051/v1), 2025-10-16
Supplement: Supplementary file 1 [file 55b7d1d2816b78b1d9c22d58.docx]

**Supplementary Tables**

**Table S1**. Pig breed sample info, sampled between 16 to 20 November 2020 (No. = total number; farm names pseudonymized). Breed types: Commercials (Pietrain x Hampshires x Durocs, Large-Whites, Durocs; COMs), Hampshires (HMPs) and Large-Whites (L-Ws).

| **Farm** | **Slaughter location** | **Damline** | **Sireline** | **No. of pigs in batch** | **Breed type** |
| --- | --- | --- | --- | --- | --- |
| W | Industry | Large White x Landrace | Pietrain x Hampshire x Duroc | 36 | COMs |
| W | Industry | Large White x Landrace | Pietrain x Hampshire x Duroc | 82 | COMs |
| W-F | Industry | Large White x Landrace | Large White | 23 | COMs |
| J-S | Industry | Large White x Landrace | Duroc | 89 | COMs |
| H | Industry | Large White x Landrace | Duroc | 98 | COMs |
| N-H | Industry | Large White x Landrace | Duroc | 17 | COMs |
| M-L | Industry | Large White x Landrace | Duroc | 1 | COMs |
| W-F | Industry | Large White x Landrace x Duroc | Hampshire | 122 | HMPs |
| W-F | Industry | Large White x Landrace x Duroc | Hampshire | 139 | HMPs |
| W-F | Industry | Large White x Landrace x Duroc | Hampshire | 80 | HMPs |
| W-F | Industry | Large White x Landrace x Duroc | Large White | 80 | L-Ws |
| W-F | Industry | Large White x Landrace x Duroc | Large White | 64 | L-Ws |
| W-F | Industry | Large White x Landrace x Duroc | Large White | 95 | L-Ws |
| W-F | Industry | Large White x Landrace x Duroc | Large White | 120 | L-Ws |

**Table S2**. Breed subset (for reduced genetic variability within the commercial breed type) sample info (No. = total number; farm names pseudonymized). Breed types: Commercials (Pietrain x Hampshires x Durocs, Large-Whites, Durocs; COMs), Hampshires (HAMPs) and Large-Whites (L-Ws).

| **Farm** | **Slaughter location** | **Damline** | **Sireline** | **No. of pigs in batch** | **Breed type** |
| --- | --- | --- | --- | --- | --- |
| J-S | Industry | Large White x Landrace | Duroc | 87 | COMs |
| H | Industry | Large White x Landrace | Duroc | 98 | COMs |
| N-H | Industry | Large White x Landrace | Duroc | 14 | COMs |
| M-L | Industry | Large White x Landrace | Duroc | 1 | COMs |
| W-F | Industry | Large White x Landrace x Duroc | Hampshire | 71 | HMPs |
| W-F | Industry | Large White x Landrace x Duroc | Hampshire | 82 | HMPs |
| W-F | Industry | Large White x Landrace x Duroc | Hampshire | 47 | HMPs |
| W-F | Industry | Large White x Landrace x Duroc | Large White | 44 | L-Ws |
| W-F | Industry | Large White x Landrace x Duroc | Large White | 36 | L-Ws |
| W-F | Industry | Large White x Landrace x Duroc | Large White | 53 | L-Ws |
| W-F | Industry | Large White x Landrace x Duroc | Large White | 67 | L-Ws |

**Table S3.** Boar taint sample info (/ = information unknown; No. = total number; company names were pseudonymized).

| **Phase I** | **Date of sampling** | **Company** | **Slaughterhouse (location)** | **No. of boars in batch** | **No. of pigs in batch** | **Batch info** |
| --- | --- | --- | --- | --- | --- | --- |
|  | 25-04-2018 | T | Tielt | 45 | 165 | */* |
|  | 31-05-2018 | M | Tielt | 121 | 252 | Porkers |
|  | 01-05-2018 | W-S | Tielt | 165 | 184 | Sow line Certus |
|  | 14-06-2018 | P | Tielt | 222 | 365 | Sow line Certus |
|  | 26-06-2018 | W-S | Tielt | 176 | 373 | Sow line Certus |
|  | 10-07-2018 | W-S | Tielt | 117 | 381 | Sow line Certus |
|  | 06-09-2018 | W-S | Tielt | 118 | 200 | Sow line Certus |
|  | 17-09-2018 | W-S | Tielt | 216 | 400 | Sow line Certus |
|  | 19-09-2018 | W | Tielt | 40 | 70 | Porkers |
|  | 26-09-2018 | */* | Westerlo | 70 | 80 | Better Life label |
|  | 26-09-2018 | */* | Westerlo | 515 | 515 | Better Life label |
|  | 03-10-2018 | W-S | Tielt | 237 | 306 | Sow line |
|  | 09-10-2018 | P | Tielt | 13 | 190 | Sow line Certus |
| **Phase II** |  |  |  |  |  |  |
|  | 21-11-2018 | */* | Westerlo | 207 | */* | Better Life label |
|  | 04-12-2018 | */* | Westerlo | 347 | */* | Better Life label |

**Table S4.** Instrument settings for pig breed and boar taint classification using REIMS.

|  | **Pig breed** | **Boar taint** |
| --- | --- | --- |
| **MS** |  |  |
| Ionisation mode | Negative | Negative |
| Scan range | 50 – 1200 Da | 400 – 1200 Da |
| Scan rate | 0.5 s | 0.5 s |
| Cone voltage | 40 V | 40 V |
| Heater bias | 40 V | 30 V |
| **Probe** |  |  |
| Power | 40 V | 40 V |
| Number of burns per sample | 5 | 2 |
| Duration of 1 burn | 3 s | 2 s |
| Time in between burns | 3 – 4 s | 2 – 3 s |

**Table S5**. Hyperparameter optimisation parameters of SVM and RF algorithms. Other parameters used the default parameters (e.g. Gini importance as criteria in RF).

| **Classification goal** | **Algorithm** | **Parameter** | **Range tested** |
| --- | --- | --- | --- |
| Breed | SVM | C | 0.001, 0.1, 10, 100, 1000000 |
|  |  | Gamma | 0.1, 0.01 |
|  |  | Kernel | 'linear', 'poly', 'RBF' |
| Breed | RF | N estimators | 10, 25, 50, 100, 250, 500 |
|  |  | Min samples leaf | 1, 3 |
|  |  | Max leaf nodes | 10, 20, 35, 50, None |
|  |  | Max depth | 15, 30, 75, 125, None |
| Boar taint | SVM | C | 0.001, 0.1, 10, 100, 1000000 |
|  |  | Gamma | 0.1, 0.01 |
|  |  | Kernel | 'linear', 'poly', 'RBF' |
| Boar taint | RF | N estimators | 10, 25, 50, 100, 250, 500 |
|  |  | Min samples leaf | 1, 3 |
|  |  | Max leaf nodes | 10, 20, 35, 50, None |
|  |  | Max depth | 15, 30, 75, 125, None |

**Table S6.** Classification confusion matrix of OPLS-DA for the overall breed dataset (n=1046; COMs=346, HMPs=341, L-Ws=359).

| **True Class** | **Predicted class** |  |  | **Accuracy** | **Precision** | **Recall** | **Specificity** | **F1-Score** |
| --- | --- | --- | --- | --- | --- | --- | --- | --- |
|  | COMs | HMPs | L-Ws |  |  |  |  |  |
| **COMs *vs.* HMPs** |  |  |  |  |  |  |  |  |
| COMs | 310 | 32 | 0 | 0.9050 | 0.9064 | 0.9038 | 0.9062 | 0.9051 |
| HMPs | 33 | 309 | 0 |  | 0.9035 | 0.9038 | 0.9038 | 0.9048 |
|  |  |  |  |  |  |  |  |  |
| **HMPs *vs.* L-Ws** |  |  |  |  |  |  |  |  |
| HMPs | 0 | 293 | 31 | 0.9152 | 0.9043 | 0.9156 | 0.9148 | 0.9099 |
| L-Ws | 0 | 27 | 333 |  | 0.9250 | 0.9148 | 0.9156 | 0.9199 |
|  |  |  |  |  |  |  |  |  |
| **COMs *vs.* L-Ws** |  |  |  |  |  |  |  |  |
| COMs | 306 | 0 | 29 | 0.9269 | 0.9134 | 0.9358 | 0.9188 | 0.9245 |
| L-Ws | 21 | 0 | 328 |  | 0.9398 | 0.9188 | 0.9358 | 0.9292 |

**Table S7**. Classification confusion matrix of OPLS-DA for the breed subset (n=600; Durocs=200, HMPs=200, L-Ws=200).

| **True Class** | **Predicted class** |  |  | **Accuracy** | **Precision** | **Recall** | **Specificity** | **F1-Score** |
| --- | --- | --- | --- | --- | --- | --- | --- | --- |
|  | COMs | HMPs | L-Ws |  |  |  |  |  |
| **COMs *vs.* HMPs** |  |  |  |  |  |  |  |  |
| COMs | 193 | 8 | 0 | 0.9450 | 0.9602 | 0.9324 | 0.9585 | 0.9461 |
| HMPs | 14 | 185 | 0 |  | 0.9296 | 0.9585 | 0.9324 | 0.9439 |
|  |  |  |  |  |  |  |  |  |
| **HMPs *vs.* L-Ws** |  |  |  |  |  |  |  |  |
| HMPs | 0 | 151 | 29 | 0.8575 | 0.8389 | 0.8436 | 0.8688 | 0.8412 |
| L-Ws | 0 | 28 | 192 |  | 0.8727 | 0.8688 | 0.8436 | 0.8707 |
|  |  |  |  |  |  |  |  |  |
| **COMs** *vs.* L-Ws |  |  |  |  |  |  |  |  |
| COMs | 170 | 0 | 19 | 0.9175 | 0.8995 | 0.9239 | 0.9120 | 0.9115 |
| L-Ws | 14 | 0 | 197 |  | 0.9336 | 0.9120 | 0.9239 | 0.9227 |

**Table S8.** Classification confusion matrix of SVM for the overall breed dataset (n=1046; COMs=346, HMPs=341, L-Ws=359).

| **True Class** | **Predicted class** |  |  | **Accuracy** | **Precision** | **Recall** | **Specificity** | **F1-Score** |
| --- | --- | --- | --- | --- | --- | --- | --- | --- |
|  | COMs | HMPs | L-Ws |  |  |  |  |  |
| **COMs *vs.* HMPs** |  |  |  |  |  |  |  |  |
| COMs | 318 | 24 | 0 | 0.9313 | 0.9326 | 0.9298 | 0.9328 | 0.9312 |
| HMPs | 23 | 319 | 0 |  | 0.9300 | 0.9328 | 0.9298 | 0.9314 |
|  |  |  |  |  |  |  |  |  |
| **HMPs *vs.* L-Ws** |  |  |  |  |  |  |  |  |
| HMPs | 0 | 287 | 40 | 0.8953 | 0.8969 | 0.8777 | 0.9108 | 0.8872 |
| L-Ws | 0 | 33 | 337 |  | 0.8939 | 0.9108 | 0.8777 | 0.9023 |
|  |  |  |  |  |  |  |  |  |
| **COMs *vs.* L-Ws** |  |  |  |  |  |  |  |  |
| COMs | 314 | 0 | 27 | 0.9458 | 0.9662 | 0.9208 | 0.9694 | 0.9429 |
| L-Ws | 11 | 0 | 349 |  | 0.9282 | 0.9694 | 0.9208 | 0.9484 |

**Table S9**. Classification confusion matrix of SVM for the breed subset (n=600; Durocs=200, HMPs=200, L-Ws=200).

| **True Class** | **Predicted class** |  |  | **Accuracy** | **Precision** | **Recall** | **Specificity** | **F1-Score** |
| --- | --- | --- | --- | --- | --- | --- | --- | --- |
|  | COMs | HMPs | L-Ws |  |  |  |  |  |
| **COMs *vs.* HMPs** |  |  |  |  |  |  |  |  |
| COMs | 193 | 8 | 0 | 0.9408 | 0.9234 | 0.9602 | 0.9196 | 0.9415 |
| HMPs | 16 | 183 | 0 |  | 0.9581 | 0.9196 | 0.9602 | 0.9385 |
|  |  |  |  |  |  |  |  |  |
| **HMPs *vs.* L-Ws** |  |  |  |  |  |  |  |  |
| HMPs | 0 | 190 | 25 | 0.9045 | 0.9360 | 0.8837 | 0.9297 | 0.9091 |
| L-Ws | 0 | 13 | 172 |  | 0.8731 | 0.9297 | 0.8837 | 0.9005 |
|  |  |  |  |  |  |  |  |  |
| **COMs *vs.* L-Ws** |  |  |  |  |  |  |  |  |
| COMs | 200 | 0 | 8 | 0.9624 | 0.9662 | 0.9639 | 0.9635 | 0.9639 |
| L-Ws | 7 | 0 | 185 |  | 0.9585 | 0.9635 | 0.9639 | 0.9610 |

**Table S10.** Model hyperparameters of SVM models for pairwise comparisons among the three breed categories in the overall dataset and (reduced genetic variability) breed subset; and boar taint datasets, as calculated on the training sets.

| **Model** | **Kernel** | **C** | **Gamma (γ)** |
| --- | --- | --- | --- |
| **All** |  |  |  |
| COMs *vs.* HMPs | Linear | 0.1 | 0.1 |
| HMPs *vs.* L-Ws | Linear | 0.001 | 0.01 |
| COMs *vs.* L-Ws | Linear | 100 | 0.1 |
| **Subset** |  |  |  |
| COMs *vs.* HMPs | Linear | 0.001 | 0.1 |
| HMPs *vs.* L-Ws | Linear | 0.1 | 0.1 |
| COMs *vs.* L-Ws | Linear | 0.1 | 0.1 |
| **Phase I boar taint** |  |  |  |
| Overall | Polynomial | 100 | 0.1 |
| Balanced | Polynomial | 1000000 | 0.1 |
| **Phase II boar taint** |  |  |  |
| Overall | Polynomial | 1000000 | 0.01 |
| Balanced | Linear | 100 | 0.1 |

**Table S11.** Model parameters of RF models for pairwise comparisons among the three breed categories in the overall dataset and (reduced genetic variability) breed subset; and boar taint datasets, as calculated on the training sets.

| **Model** | **n trees** | **Min samples leaf** | **Max leaf nodes** | **Max depth** |
| --- | --- | --- | --- | --- |
| **Overall breed** |  |  |  |  |
| COMs *vs.* HMPs | 500 | 3 | 35 | 75 |
| HMPs *vs.* L-Ws | 50 | 1 | None | None |
| COMs *vs.* L-Ws | 500 | 3 | None | 125 |
| **Breed subset** |  |  |  |  |
| COMs *vs.* HMPs | 500 | 1 | None | 30 |
| HMPs *vs.* L-Ws | 50 | 3 | None | 15 |
| COMs *vs.* L-Ws | 100 | 3 | 3 | None |
| **Phase I boar taint** |  |  |  |  |
| Overall | 100 | 3 | 10 | 15 |
| Balanced | 50 | 3 | 10 | 30 |
| **Phase II boar taint** |  |  |  |  |
| Overall | 100 | 3 | 20 | 75 |
| Balanced | 100 | 3 | 20 | None |

**Table S12.** Classification confusion matrix of RF for the overall breed dataset (n=1046; COMs=346, HMPs=341, L-Ws=359).

| **True Class** | **Predicted class** |  |  | **Accuracy** | **Precision** | **Recall** | **Specificity** | **F1-Score** |
| --- | --- | --- | --- | --- | --- | --- | --- | --- |
|  | COMs | HMPs | L-Ws |  |  |  |  |  |
| **COMs *vs.* HMPs** |  |  |  |  |  |  |  |  |
| COMs | 262 | 80 | 0 | 0.7909 | 0.8062 | 0.7661 | 0.8158 | 0.7856 |
| HMPs | 63 | 279 | 0 |  | 0.7772 | 0.8158 | 0.7661 | 0.7960 |
|  |  |  |  |  |  |  |  |  |
| **HMPs *vs.* L-Ws** |  |  |  |  |  |  |  |  |
| HMPs | 0 | 231 | 96 | 0.7202 | 0.7000 | 0.7064 | 0.7324 | 0.7032 |
| L-Ws | 0 | 99 | 271 |  | 0.7384 | 0.7324 | 0.7064 | 0.7354 |
|  |  |  |  |  |  |  |  |  |
| **COMs *vs.* L-Ws** |  |  |  |  |  |  |  |  |
| COMs | 262 | 0 | 79 | 0.7946 | 0.8012 | 0.7683 | 0.8194 | 0.7844 |
| L-Ws | 65 | 0 | 295 |  | 0.7888 | 0.8194 | 0.7683 | 0.8038 |

**Table S13.** Classification confusion matrix of RF for the breed subset (n=600; Durocs=200, HMPs=200, L-Ws=200).

| **True Class** | **Predicted class** |  |  | **Accuracy** | **Precision** | **Recall** | **Specificity** | **F1-Score** |
| --- | --- | --- | --- | --- | --- | --- | --- | --- |
|  | COMs | HMPs | L-Ws |  |  |  |  |  |
| **COMs *vs.* HMPs** |  |  |  |  |  |  |  |  |
| COMs | 177 | 24 | 0 | 0.8701 | 0.8634 | 0.8806 | 0.8593 | 0.8719 |
| HMPs | 28 | 171 | 0 |  | 0.8769 | 0.8593 | 0.8806 | 0.8680 |
|  |  |  |  |  |  |  |  |  |
| **HMPs *vs.* L-Ws** |  |  |  |  |  |  |  |  |
| HMPs | 0 | 141 | 74 | 0.7125 | 0.7747 | 0.6558 | 0.7784 | 0.7103 |
| L-Ws | 0 | 41 | 144 |  | 0.6606 | 0.7784 | 0.6558 | 0.7146 |
|  |  |  |  |  |  |  |  |  |
| **COMs *vs.* L-Ws** |  |  |  |  |  |  |  |  |
| COMs | 172 | 0 | 36 | 0.8375 | 0.8557 | 0.8269 | 0.8490 | 0.8411 |
| L-Ws | 29 | 0 | 163 |  | 0.8191 | 0.8490 | 0.8269 | 0.8338 |

**Table S14.** Classification confusion matrices of OPLS-DA boar taint models (test set results).

| **True Class** | **Predicted class** |  | **Accuracy** | **Precision** | **Recall** | **Specificity** | **F1-Score** |
| --- | --- | --- | --- | --- | --- | --- | --- |
|  | Tainted | Untainted |  |  |  |  |  |
| **Phase I overall** |  |  |  |  |  |  |  |
| Tainted | 9 | 15 | 0.9418 | 0.3750 | 0.9000 | 0.9434 | 0.5294 |
| Untainted | 1 | 250 |  | 0.9960 | 0.9434 | 0.9000 | 0.9690 |
|  |  |  |  |  |  |  |  |
| **Phase I balanced** |  |  |  |  |  |  |  |
| Tainted | 24 | 2 | 0.9592 | 0.9231 | 1.0000 | 0.9200 | 0.9600 |
| Untainted | 0 | 23 |  | 1.0000 | 0.9200 | 1.0000 | 0.9583 |
|  |  |  |  |  |  |  |  |
| **Phase II overall** |  |  |  |  |  |  |  |
| Tainted | 6 | 11 | 0.7170 | 0.3529 | 0.6000 | 0.7442 | 0.4444 |
| Untainted | 4 | 32 |  | 0.8889 | 0.7442 | 0.6000 | 0.8101 |
|  |  |  |  |  |  |  |  |
| **Phase II balanced** |  |  |  |  |  |  |  |
| Tainted | 8 | 8 | 0.6061 | 0.5000 | 0.6154 | 0.6000 | 0.5517 |
| Untainted | 5 | 12 |  | 0.7059 | 0.6000 | 0.6154 | 0.6486 |

**Table S15.** Classification confusion matrices of SVM boar taint models (test set results).

| **True Class** | **Predicted class** |  | **Accuracy** | **Precision** | **Recall** | **Specificity** | **F1-Score** |
| --- | --- | --- | --- | --- | --- | --- | --- |
|  | Tainted | Untainted |  |  |  |  |  |
| **Phase I overall** |  |  |  |  |  |  |  |
| Tainted | 8 | 16 | 0.9345 | 0.3333 | 0.8000 | 0.9396 | 0.4706 |
| Untainted | 2 | 249 |  | 0.9920 | 0.9396 | 0.8000 | 0.9651 |
|  |  |  |  |  |  |  |  |
| **Phase I balanced** |  |  |  |  |  |  |  |
| Tainted | 24 | 2 | 0.9388 | 0.9231 | 0.9600 | 0.9167 | 0.9412 |
| Untainted | 1 | 22 |  | 0.9565 | 0.9167 | 0.9600 | 0.9362 |
|  |  |  |  |  |  |  |  |
| **Phase II overall** |  |  |  |  |  |  |  |
| Tainted | 4 | 13 | 0.7358 | 0.2353 | 0.8000 | 0.7292 | 0.3636 |
| Untainted | 1 | 35 |  | 0.9722 | 0.7292 | 0.8000 | 0.8333 |
|  |  |  |  |  |  |  |  |
| **Phase II balanced** |  |  |  |  |  |  |  |
| Tainted | 11 | 5 | 0.6970 | 0.6875 | 0.6875 | 0.7059 | 0.6875 |
| Untainted | 5 | 12 |  | 0.7059 | 0.7059 | 0.6875 | 0.7059 |

**Table S16.** Classification confusion matrices of RF boar taint models (test set results).

| **True Class** | **Predicted class** |  | **Accuracy** | **Precision** | **Recall** | **Specificity** | **F1-Score** |
| --- | --- | --- | --- | --- | --- | --- | --- |
|  | Tainted | Untainted |  |  |  |  |  |
| **Phase I overall** |  |  |  |  |  |  |  |
| Tainted | 10 | 14 | 0.9455 | 0.4167 | 0.9091 | 0.9470 | 0.5714 |
| Untainted | 1 | 250 |  | 0.9960 | 0.9470 | 0.9091 | 0.9709 |
|  |  |  |  |  |  |  |  |
| **Phase I balanced** |  |  |  |  |  |  |  |
| Tainted | 25 | 1 | 0.9592 | 0.9615 | 0.9615 | 0.9565 | 0.9615 |
| Untainted | 1 | 22 |  | 0.9565 | 0.9565 | 0.9615 | 0.9565 |
|  |  |  |  |  |  |  |  |
| **Phase II overall** |  |  |  |  |  |  |  |
| Tainted | 1 | 16 | 0.6981 | 0.0588 | 1.0000 | 0.6923 | 0.1111 |
| Untainted | 0 | 36 |  | 1.0000 | 0.6923 | 1.0000 | 0.8182 |
|  |  |  |  |  |  |  |  |
| **Phase II balanced** |  |  |  |  |  |  |  |
| Tainted | 9 | 7 | 0.6970 | 0.5625 | 0.7500 | 0.6667 | 0.6429 |
| Untainted | 3 | 14 |  | 0.8235 | 0.6667 | 0.7500 | 0.7368 |

**Supplementary Figures**

**
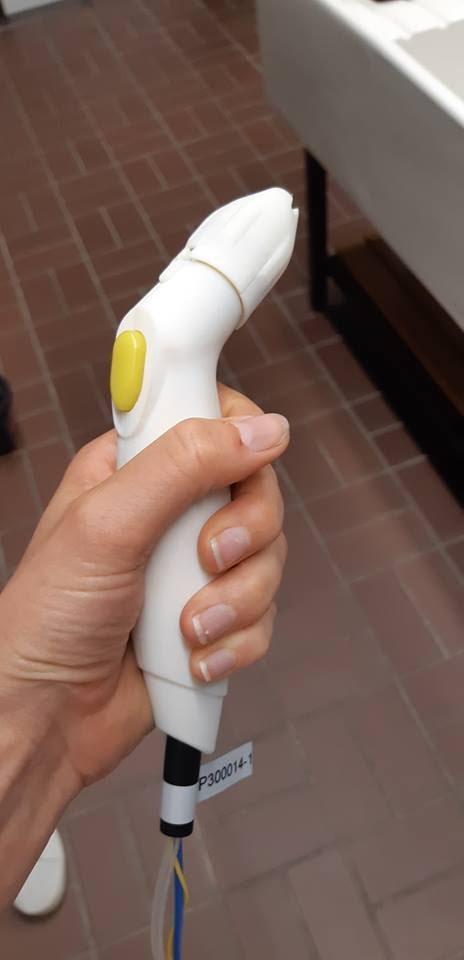
**

**Figure S1:** Picture of the hand-held, 3D-printed ‘fat probe’ designed for at-line application. The fat probe is a bi-polar probe, with the addition of a spacer and sheath to avoid short-circuit. Optimisation included the development of a more ergonomic and user-friendly design, strengthening of probe arms to reduce twisting / movement during sampling and a more durable connection of wires and tubing to the hand piece.

**
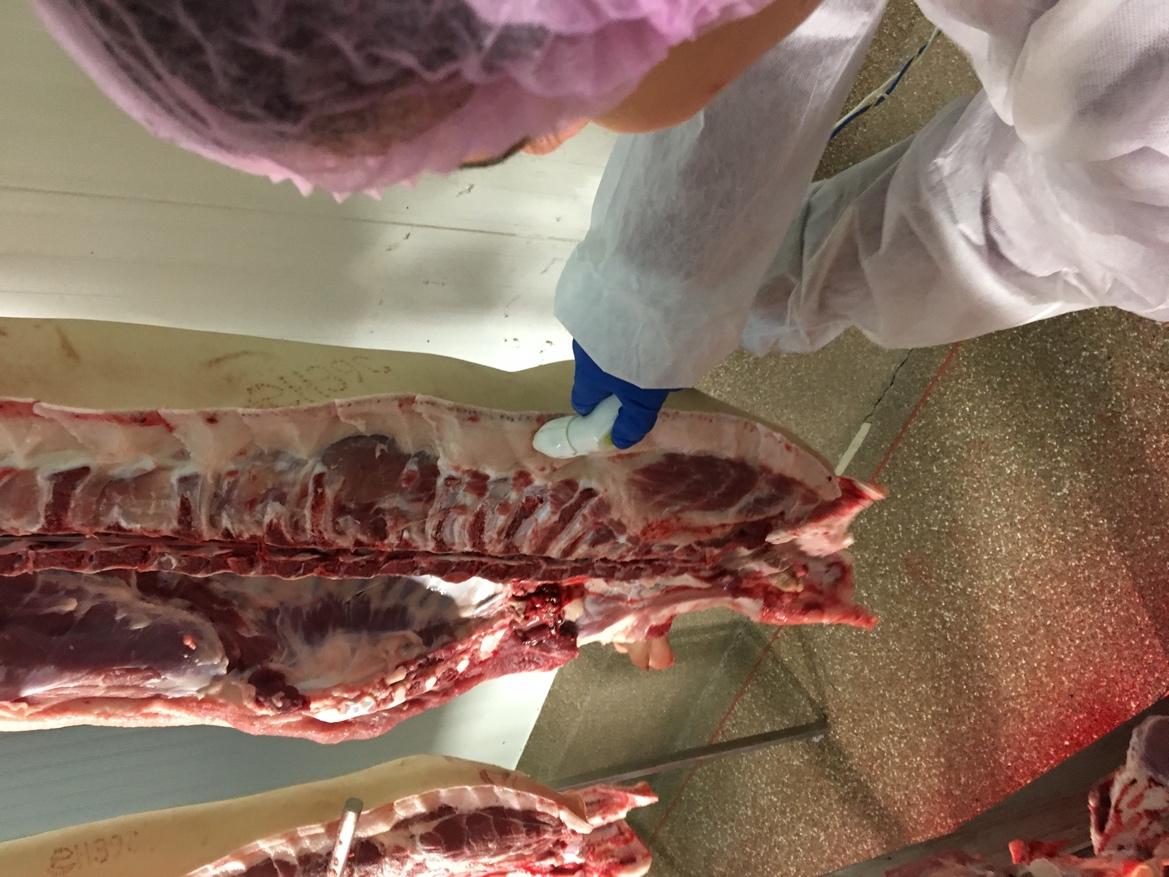
**

**Figure S2**: Picture of the application of the fat probe.
